# Supplementary material for: Evaluation of the broad-spectrum lytic capability of bacteriophage cocktails against various Salmonella serovars and their effects on weaned pigs infected with Salmonella Typhimurium
Source: PubMed Central journal article supplement — J Vet Med Sci. 2018 Apr 4;80(6):851–60. doi: 10.1292/jvms.17-0501 (PMC6021886; doi:10.1292/jvms.17-0501), 2018-04-04
Supplement: jvms-80-851-s001.pdf [file jvms-80-851-s001.pdf]

**Table S1.** The source and host range of individual bacteriophage against *Salmonella* reference strains

| Bacteriophage | Source (Area)   | Host range                                                                                                                                                                                                                                                                                                                                                                                                                                                                                                                                             | No. of strains susceptible to bacteriophage |
|---------------|-----------------|--------------------------------------------------------------------------------------------------------------------------------------------------------------------------------------------------------------------------------------------------------------------------------------------------------------------------------------------------------------------------------------------------------------------------------------------------------------------------------------------------------------------------------------------------------|---------------------------------------------|
| SEP-1         | Feces (Paju)    | Derby <sup>a)</sup> , Eko <sup>a)</sup> , Haifa <sup>a)</sup> , Paratyphi B <sup>a)</sup> , Typhimurium <sup>a)</sup> ,<br>Abaetetuba <sup>b)</sup> , Aberdeen <sup>b)</sup> , Berta <sup>a)</sup> , Enteritidis <sup>a)</sup> , Glostrup <sup>b)</sup> ,<br>Kentucky <sup>b)</sup> , Litchfield <sup>b)</sup> , Muenchen <sup>b)</sup> , Tallahassee <sup>b)</sup> , Wippra <sup>b)</sup>                                                                                                                                                             | 15                                          |
| SGP-1         | Feces (Paju)    | Amsterdam <sup>b)</sup> , Give <sup>b)</sup> , Illinois <sup>b)</sup> , Enteritidis <sup>b)</sup>                                                                                                                                                                                                                                                                                                                                                                                                                                                      | 4                                           |
| STP-1         | Sewages (Paju)  | Typhimurium <sup>a)</sup> , Liverpool <sup>b)</sup> , Senftenberg <sup>b)</sup> , Muenster <sup>b)</sup> ,<br>Onireke <sup>b)</sup> , Westhampton <sup>b)</sup> , Enteritidis <sup>a)</sup> , Glostrup <sup>b)</sup> ,<br>Kentucky <sup>b)</sup> , Litchfield <sup>b)</sup> , Muenchen <sup>b)</sup> , Tallahassee <sup>b)</sup> ,<br>Wippra <sup>b)</sup> , Bareilly <sup>b)</sup> , Braenderup <sup>b)</sup> , Choleraesuis <sup>b)</sup> ,<br>Colindale <sup>b)</sup> , Oranienburg <sup>b)</sup> , Tennessee <sup>b)</sup> , Virchow <sup>b)</sup> | 20                                          |
| SalTP-2       | Sewages (Paju)  | Typhimurium <sup>a)</sup> , Abaetetuba <sup>b)</sup> , Aberdeen <sup>b)</sup> , Enteritidis <sup>a)</sup>                                                                                                                                                                                                                                                                                                                                                                                                                                              | 4                                           |
| SS3eP-1       | Sewages (Paju)  | Typhimurium <sup>a)</sup> , Kedougou <sup>b)</sup> , Sundsvall <sup>b)</sup> , Hillingdon <sup>b)</sup> ,<br>Dublin <sup>a)</sup> , Enteritidis <sup>a)</sup> , Glostrup <sup>b)</sup> , Kentucky <sup>b)</sup> , Litchfield <sup>b)</sup> ,<br>Muenchen <sup>b)</sup> , Tallahassee <sup>b)</sup> , Wippra <sup>b)</sup>                                                                                                                                                                                                                              | 12                                          |
| EK99P-1       | Sewages (Asan)  | Typhimurium <sup>a)</sup> , Enteritidis <sup>a)</sup>                                                                                                                                                                                                                                                                                                                                                                                                                                                                                                  | 2                                           |
| SChP-1        | Sewages (Asan)  | Derby <sup>a)</sup> , Eko <sup>a)</sup> , Haifa <sup>a)</sup> , Paratyphi B <sup>a)</sup> , Typhimurium <sup>a)</sup> ,<br>Dublin <sup>a)</sup> , Enteritidis <sup>a)</sup>                                                                                                                                                                                                                                                                                                                                                                            | 7                                           |
| SAP-1         | Sewages (Asan)  | Berta <sup>a)</sup> , Enteritidis <sup>a)</sup>                                                                                                                                                                                                                                                                                                                                                                                                                                                                                                        | 2                                           |
| SAP-2         | Sewages (Asan)  | Enteritidis <sup>a)</sup>                                                                                                                                                                                                                                                                                                                                                                                                                                                                                                                              | 1                                           |
| E41P-1        | Sewages (Asan)  | Typhimurium <sup>a)</sup> , Enteritidis <sup>a)</sup>                                                                                                                                                                                                                                                                                                                                                                                                                                                                                                  | 2                                           |
| EK88P-1       | Sewages (Yesan) | Typhimurium <sup>a)</sup> , Enteritidis <sup>a)</sup>                                                                                                                                                                                                                                                                                                                                                                                                                                                                                                  | 2                                           |
| CPP-3         | Feces (Yesan)   | Typhimurium <sup>a)</sup> , Enteritidis <sup>a)</sup>                                                                                                                                                                                                                                                                                                                                                                                                                                                                                                  | 2                                           |
| CPP-5         | Feces (Yesan)   | Typhimurium <sup>a)</sup> , Enteritidis <sup>a)</sup>                                                                                                                                                                                                                                                                                                                                                                                                                                                                                                  | 2                                           |

<sup>a)</sup> Indicates clear lytic activity and <sup>b)</sup> represents turbid lytic activity for test strains
